# Supplementary material for: Further Insights Into the Interaction of Human and Animal Complement Regulator Factor H With Viable Lyme Disease Spirochetes
Source: PubMed Central journal article supplement (PMC6365980; doi:10.3389/fvets.2018.00346), 2019-01-31
Supplement: Image_1.pdf [file Image_1.pdf]

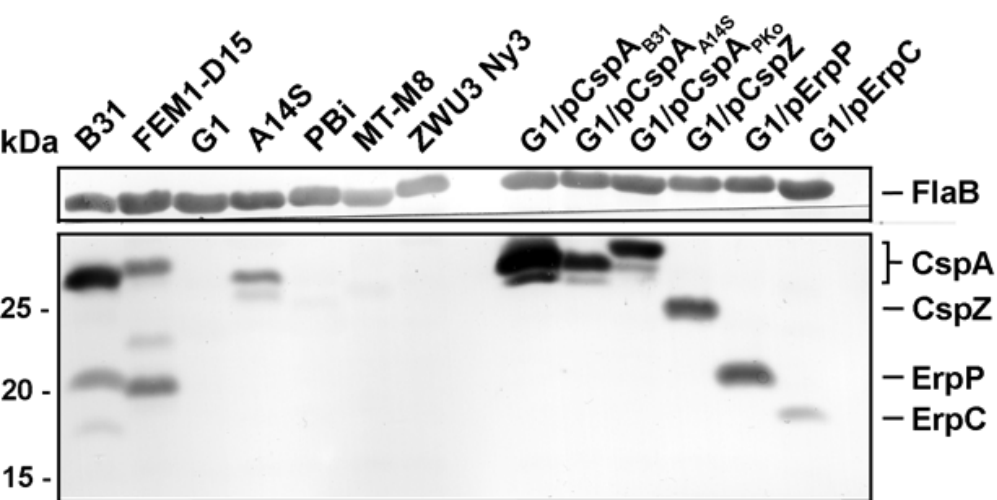

**Supplementary figure 1. Identification of FH-binding proteins among borrelial strains by Far Western blotting.**

Cell lysates (30 µg each) obtained from wild type borrelial strains *B. burgdorferi* B31, *B. afzelii* FEM1-D15, *B. garinii* G1, *B. spielmanii* A14S, *B. bavariensis* PBi, *B. lusitanae* MT-M8, and *B. valaisiana* ZWU3 Ny3 as well as from transformants producing distinct CRASP proteins were subjected to 10 % tris/tricine SDS-PAGE and transferred to nitrocellulose. The membrane was incubated with human serum as source for FH and potential FH-binding proteins were detected using a goat anti-FH serum (1:1,000). Monoclonal antibody L41 1C11 recognizing the FlaB protein was used to show equal loading of bacterial lysates. The CRASP proteins CspA, CspZ, ErpP, and ErpC of *B. burgdorferi* B31 are indicated on the right and the mobility of the marker proteins is indicated on the left.
