# Supplementary material for: Further Insights Into the Interaction of Human and Animal Complement Regulator Factor H With Viable Lyme Disease Spirochetes
Source: PubMed Central journal article supplement (PMC6365980; doi:10.3389/fvets.2018.00346), 2019-01-31
Supplement: Image_2.pdf [file Image_2.pdf]

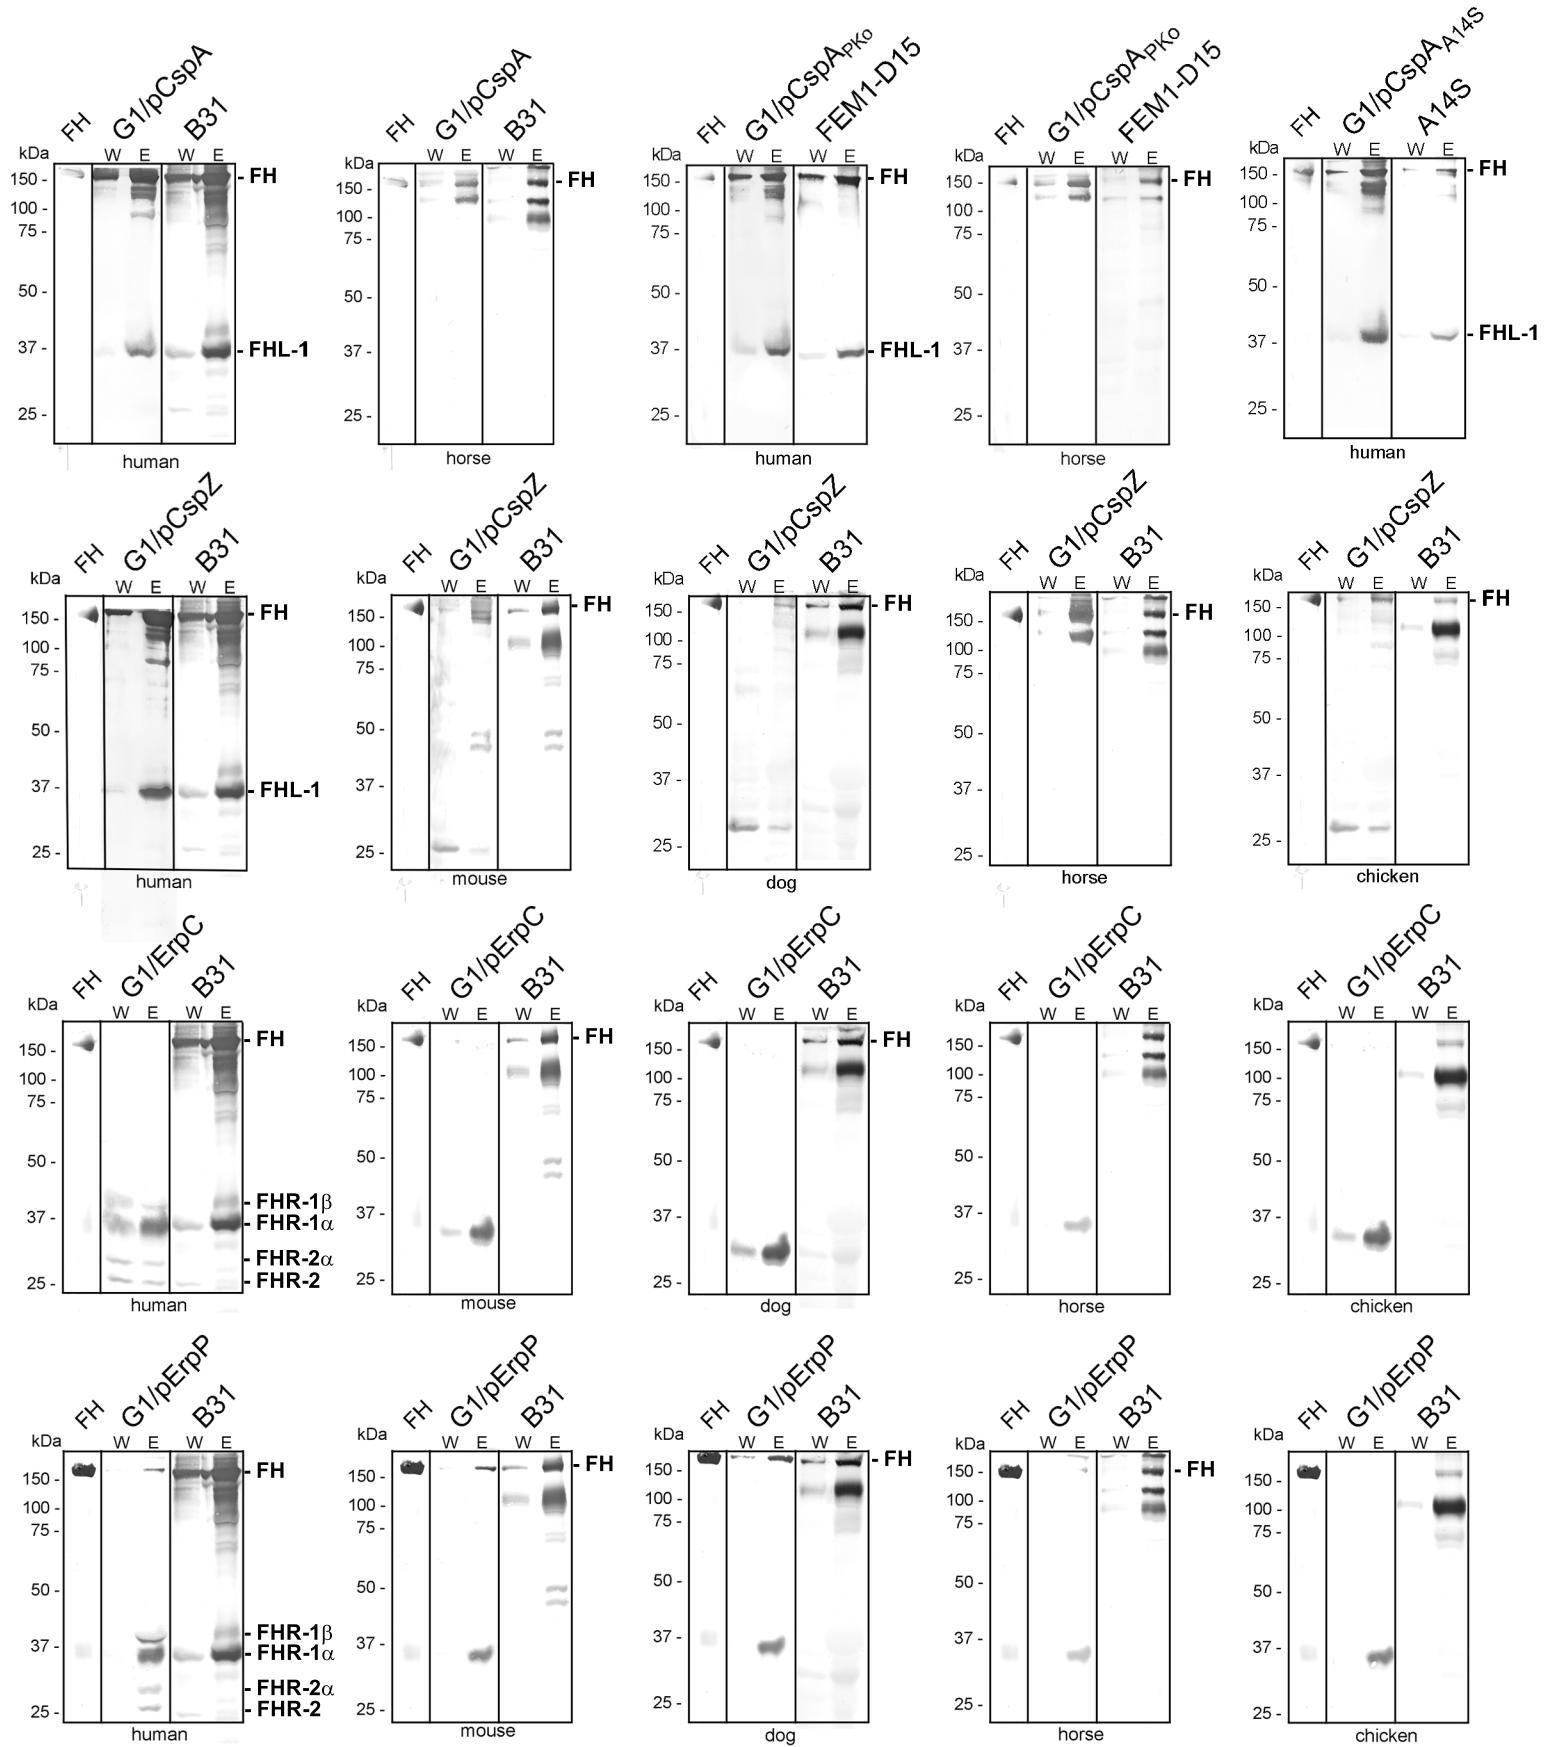

**Supplementary figure 2. Determination of FH-binding proteins among *Borrelia* strains.**

Selected membranes obtained from the Far Western blotting with the wild type *Borrelia* strains (see figure 2) as well as with transformants producing distinct CRASP proteins (see figure 3) were arranged next to each other for direct comparison.
