# Supplementary material for: Further Insights Into the Interaction of Human and Animal Complement Regulator Factor H With Viable Lyme Disease Spirochetes
Source: PubMed Central journal article supplement (PMC6365980; doi:10.3389/fvets.2018.00346), 2019-01-31
Supplement: Table_1.pdf [file Table_1.pdf]

**Supplementary table 1. Borrelial strains used in the study**

| Genospecies           | Strain   | Origin                     |                 | Serum susceptibility <sup>a</sup> |
|-----------------------|----------|----------------------------|-----------------|-----------------------------------|
|                       |          | Biological                 | Geographical    |                                   |
| <i>B. burgdorferi</i> | B31      | Tick, <i>I. scapularis</i> | USA             | Resistant                         |
| <i>B. afzelii</i>     | FEM1-D15 | Human, skin                | Germany         | Resistant                         |
| <i>B. garinii</i>     | G1       | Human, CSF <sup>b</sup>    | Germany         | Sensitive                         |
| <i>B. spielmanii</i>  | A14S     | Human, skin                | The Netherlands | Resistant                         |
| <i>B. lusitaniae</i>  | MT-M8    | Tick, <i>I. ricinus</i>    | Portugal        | Sensitive                         |
| <i>B. valaisiana</i>  | ZWU3 Ny3 | Tick, <i>I. ricinus</i>    | Germany         | Resistant                         |

<sup>a</sup>Serum resistance was determined by incubation of spirochetes in the presence of 50% NHS by a colorimetric growth inhibition assay and by immunofluorescence staining of deposited complement components C3, C6, and C5b-9 (Kraiczy et al., 2000)

<sup>b</sup>CSF, cerebrospinal fluid
