# Supplementary material for: Further Insights Into the Interaction of Human and Animal Complement Regulator Factor H With Viable Lyme Disease Spirochetes
Source: PubMed Central journal article supplement (PMC6365980; doi:10.3389/fvets.2018.00346), 2019-01-31
Supplement: Table_2.pdf [file Table_2.pdf]

**Supplementary table 2. Borrelial transformants used in the study**

| Genospecies       | Strain | Ectopically expressed protein                 | Strain description |
|-------------------|--------|-----------------------------------------------|--------------------|
| <i>B. garinii</i> | G1     | CspA (CRASP-1) from <i>B. burgdorferi</i> LW2 | G1/ pCspA          |
| <i>B. garinii</i> | G1     | CspA (CRASP-1) from <i>B. spielmanii</i> A14S | G1/pCspA A14S      |
| <i>B. garinii</i> | G1     | CspA (CRASP-1) from <i>B. afzelii</i> PKo     | G1/pCspA PKo       |
| <i>B. garinii</i> | G1     | CspZ (CRASP-2) from <i>B. burgdorferi</i> LW2 | G1/pCspZ           |
| <i>B. garinii</i> | G1     | ErpP (CRASP-3) from <i>B. burgdorferi</i> LW2 | G1/pErpP           |
| <i>B. garinii</i> | G1     | ErpC (CRASP-4) from <i>B. burgdorferi</i> LW2 | G1/pErpC           |
