# Supplementary material for: Further Insights Into the Interaction of Human and Animal Complement Regulator Factor H With Viable Lyme Disease Spirochetes
Source: PubMed Central journal article supplement (PMC6365980; doi:10.3389/fvets.2018.00346), 2019-01-31
Supplement: Table_3.pdf [file Table_3.pdf]

### Supplementary table 3. Data report of the peptide mass fingerprint search by MASCOT

Data report for the 120-kDa band of *Equus caballus* corresponding to FH

| Scores | Position of amino acids | Sequence          | Modification        |
|--------|-------------------------|-------------------|---------------------|
| 37.3   | 66-75                   | R.TLGTITMQCR.N    | Carbamidomethyl: 9  |
| 58.9   | 76-86                   | R.NGQWVALNPSR.I   |                     |
| 35.8   | 154-164                 | K.CLPVTEPENGR.L   | Carbamidomethyl: 1  |
| 23.3   | 248-254                 | R.GFEYSER.G       |                     |
| 40.5   | 262-271                 | K.FGWSPIPSCR.E    | Carbamidomethyl: 9  |
| 26.9   | 384-395                 | R.AEGWSPA VPCLR.Q | Carbamidomethyl: 10 |
| 44.4   | 413-421                 | R.TYLQGESVK.V     |                     |
| 51.2   | 516-526                 | K.YCDMPVFENAR.A   | Carbamidomethyl: 2  |
| 25.9   | 576-584                 | R.ECKIPQIER.Y     | Carbamidomethyl: 2  |
| 27.2   | 579-584                 | K.IPQIER.Y        |                     |

Data for the 45-kDa band of *Equus caballus* corresponding to a histidine-rich glycoprotein

| Scores | Position of amino acids | Sequence        | Modification        |
|--------|-------------------------|-----------------|---------------------|
| 61.8   | 99-109                  | R.RPSDIVIGQCK.V | Carbamidomethyl: 10 |
| 63.4   | 171-179                 | R.ENDDFASFR.V   |                     |
